# Supplementary material for: Cloud and precipitation properties from ground-based remote-sensing instruments in East Antarctica
Source: Copernicus journal article supplement (doi:10.5194/tc-9-285-2015), 2015-02-11
Supplement: Supplementary file 1 [file tc-9-285-2015-supplement.zip]

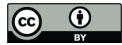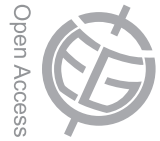

## *Supplement of*

# **Cloud and precipitation properties from ground-based remote-sensing instruments in East Antarctica**

**I. V. Gorodetskaya et al.**

*Correspondence to:* I. V. Gorodetskaya ([irina.gorodetskaya@ees.kuleuven.be](mailto:irina.gorodetskaya@ees.kuleuven.be))

- tc-9-285-2015-supplement-cover-letter.pdf
- 20120207\_01-03cet.mov
- 20120209\_00-07cet.mov
- 20130408\_08-18cet.mov
- Supplement\_info.pdf
- \_\_MACOSX
  - .\_20120207\_01-03cet.mov
  - .\_20120209\_00-07cet.mov
  - .\_20130408\_08-18cet.mov
  - .\_Supplement\_info.pdf
