# Supplementary material for: Cloud and precipitation properties from ground-based remote-sensing instruments in East Antarctica
Source: Copernicus journal article supplement (doi:10.5194/tc-9-285-2015), 2015-02-11
Supplement: Supplementary file 2 [file tc-9-285-2015-supplement.zip]

Supplementary material contains movies made with 1-second webcam images (10 frames per second), including the wind-driven blowing snow event on 8 April 2013 (Case 4, 20130408\_08-18cet.mov), and two extracts showing cloud evolution during the week 6-13 February 2012 (20120207\_01-03cet.mov and 20120209\_00-07cet.mov)

More movies for Cases 1-4 and other days are available at:  
<http://ees.kuleuven.be/hydrant/database/quicklooks.html?instrument=webcam>  
(see February 2012)
